# Supplementary material for: Shape selectivity of zeolite for hydroisomerization of long-chain alkanes
Source: Royal Society of Chemistry journal article supplement (doi:10.1039/d2nj04976g), 2022-12-19
Supplement: d2nj04976g1.pdf [file d2nj04976g1.pdf]

## 1. Reagents

All reagents were used as received without further purification in present study: silica sol (SiO<sub>2</sub> = 30 wt.%, Qingdao Haiyang Chemical Co., Ltd.), aluminum sulfate (99%, Sinopharm Chemical Reagent Co., Ltd.), sodium aluminate (98 wt.%, Tianjin Guangfu Fine Chemical Research Institute), potassium hydroxide (85 wt.%, Beijing Chemical Co., Ltd.), sodium hydroxide (96 wt.%, Beijing Chemical Co., Ltd.), 1,6-diaminohexane (99 wt.%, DAH, Sinopharm Chemical Reagent Co., Ltd.), Tetraethylammonium bromide (98 wt.%, TEABr, Shanghai Aladdin Biochemical Technology Co., Ltd.), hydrochloric acid (37 wt.%, Sinopharm Chemical Reagent Co., Ltd.), ammonium chloride (98 wt.%, Beijing Chemical Co., Ltd.), H<sub>2</sub>PtCl<sub>6</sub>·6H<sub>2</sub>O (37 wt.%, Sinopharm Chemical Reagent Co., Ltd.), and de-ionized water.

## 2. Model and molecular dynamics simulation details

### 2.1. The calculation of the size of molecule

The length, width and height of a molecule are calculated from the difference between the maximum and the minimum coordinate of a molecule at each direction (*i.e.* x, y and z)<sup>1</sup>. In this work, the length, width and height are defined as formula (3) to (5). X<sub>max</sub>/X<sub>min</sub> (Y<sub>max</sub>/Y<sub>min</sub> or Z<sub>max</sub>/Z<sub>min</sub>) is the maximum/minimum coordinate of the atom inside the molecule at different directions. Corresponding schematic diagram for the definition of the molecular length, width and height is shown in Fig. S1.

$$\text{Length} = X_{\max} - X_{\min} \quad (3)$$

$$\text{Width} = Z_{\max} - Z_{\min} \quad (4)$$

$$\text{Height} = Y_{\max} - Y_{\min} \quad (5)$$

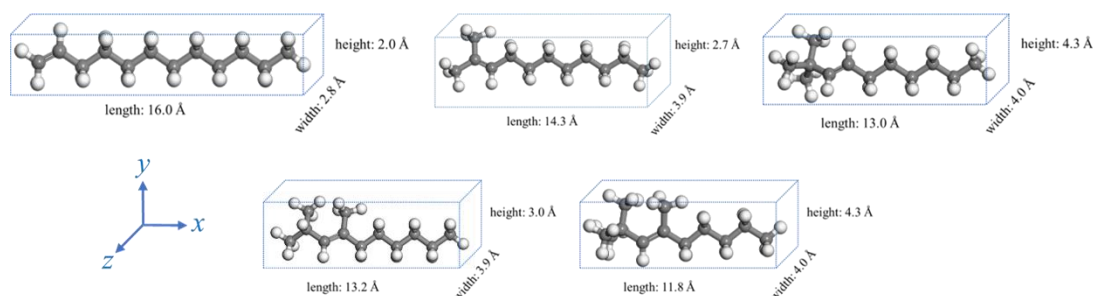

21

22

Fig. S1. Definition of the molecule length, width and height

23

### 2.2. Monte Carlo (MC) simulation

The initial framework was derived from International Zeolite Associations (IZA) database<sup>2</sup>. The 2 × 2 × 6, 2 × 10 × 4 and 2 × 2 × 5 supercell structure was selected for TON, MTW and MOR zeolite and optimized by GULP<sup>3</sup> with SLC<sup>4</sup> core-shell force field. In MC simulations, a Nosé-Hoover thermostat was adopted, the temperature was maintained at 25 °C. The MC simulation was operated at 8, 16 and 8 loadings for TON, MTW and MOR zeolite (one molecule per channel). The simulation was equilibrated for 1 × 10<sup>6</sup> steps, followed by another 1 × 10<sup>7</sup> steps of production. All the interactions in this system were described by a widely used COMPASS force field<sup>5</sup>.

31

### 2.3. Molecular dynamic (MD) simulations

32

33

The output structures of the MC simulation were used as the initial structure of the MD simulation. In the simulation, the COMPASS<sup>5</sup> force field was also applied in this system. A Nosé-Hoover thermostat

1 was employed, the temperature was set at 280 °C in NVT ensemble. The host-guest interactions were  
2 modeled by Lennard-Jones potential, with a cutoff radius 12.5 Å. All the simulations were equilibrated  
3 for 1 ns follow by 20 ns of statistics, with a time step of 1 fs. The trajectories of molecules were recorded  
4 every 1000 steps. For each system, independent MD simulations of 5 times was done to obtain a reliable  
5 result statistically. All MD simulations were conducted on the Materials Studio 7.0 with Forcite module.

#### 6 2.4. Diffusion coefficient

7 Based on the MD simulations, the mean square displacement (MSD) of adsorbate was computed by  
8 the relation:

$$9 \quad MSD(\tau) = \frac{1}{N_m} \sum_i^{N_m} \frac{1}{N_t} \sum_{t_0}^{N_t} [r_i(t_0 + \tau) - r_i(t_0)]^2 \quad (1)$$

10 where  $N_m$  indicated the number of molecule and  $r_i$  referred to the location of the center of mass of  
11 molecule  $i$ . From Einstein relation <sup>6</sup>, the self-diffusion coefficient,  $D_s$ , was calculated:

$$12 \quad MSD(\tau) = 2nD_s\tau + b \quad (2)$$

13 where  $n$  represented the framework dimension ( $n = 1$  for TON, MTW and MOR).  $D_s$  was computed as  
14 the mean value of five independent MD trajectories by fitting the MSD curve in the linear region, using  
15 a least-square fit.

16

1 **3. Samples characteristics**

2 3.1. Textural properties of Pt/H-form samples.

3 Table S1

4 Textural properties of Pt/H-form samples.

| Sample         | Surface area (m <sup>2</sup> /g) <sup>a</sup> |                  |                  | Micropore Volume<br>(cm <sup>3</sup> /g) <sup>b</sup> |
|----------------|-----------------------------------------------|------------------|------------------|-------------------------------------------------------|
|                | S <sub>BET</sub>                              | S <sub>mic</sub> | S <sub>ext</sub> |                                                       |
| Pt/H-ZSM-22(1) | 214.8                                         | 166.1            | 48.6             | 0.08                                                  |
| Pt/H-ZSM-22(2) | 198.7                                         | 165.9            | 32.8             | 0.08                                                  |
| Pt/H-ZSM-22(3) | 187.5                                         | 162.6            | 24.9             | 0.08                                                  |
| Pt/H-ZSM-12(1) | 308.6                                         | 205.8            | 102.8            | 0.10                                                  |
| Pt/H-ZSM-12(2) | 299.6                                         | 199.7            | 99.9             | 0.10                                                  |
| Pt/H-ZSM-12(3) | 300.2                                         | 196.5            | 103.8            | 0.10                                                  |
| Pt/H-MOR(1)    | 394.6                                         | 356.8            | 37.8             | 0.18                                                  |
| Pt/H-MOR(2)    | 376.5                                         | 328.0            | 48.4             | 0.16                                                  |
| Pt/H-MOR(3)    | 394.0                                         | 344.7            | 49.4             | 0.17                                                  |

5 <sup>a</sup> Determined by the BET method.

6 <sup>b</sup> Calculated from the t-plot.

7

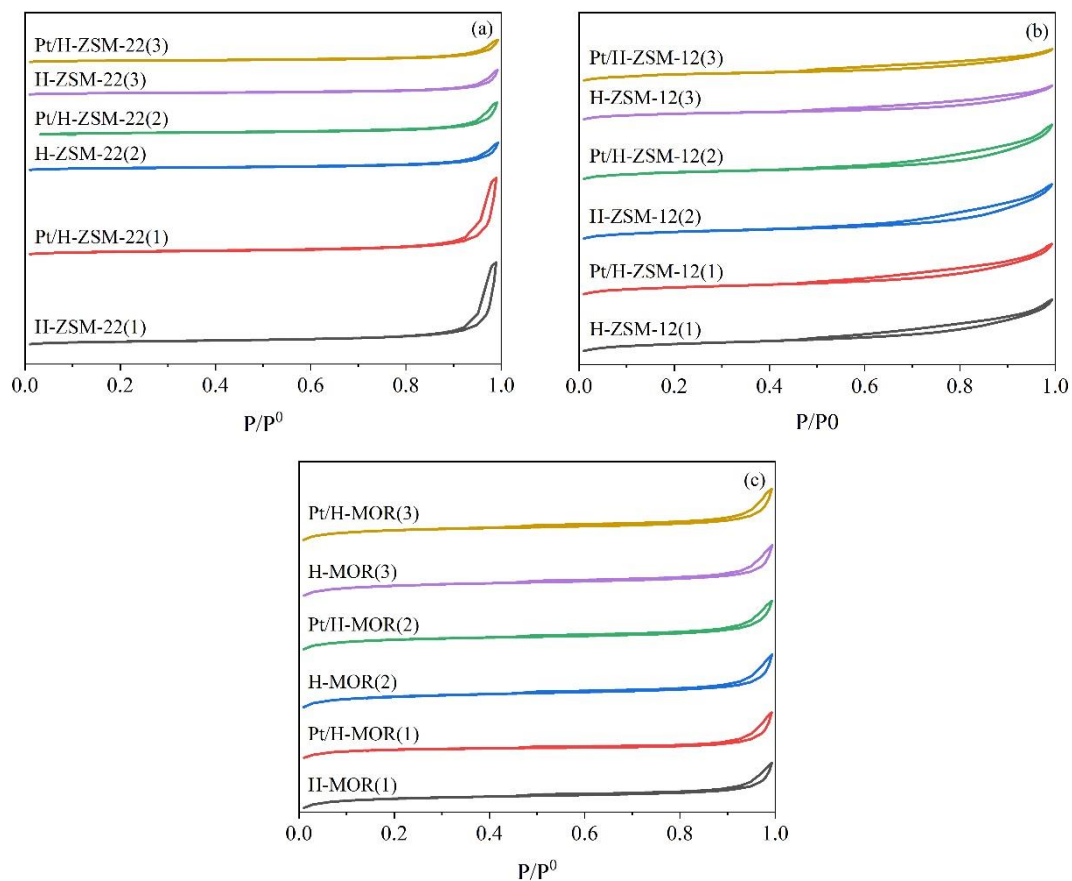

1 Fig. S2. N<sub>2</sub> adsorption-desorption isotherms of H- and Pt/H-form samples (a) ZSM-22, (b) ZSM-12, (c)  
 2 MOR.  
 3 3.2. Acidity  
 4 Table S2  
 5 Acidity of different catalysts from NH<sub>3</sub>-TPD

| Sample      | Acidity ( $\mu\text{mol NH}_3/\text{g cat}$ ) |                     |                    |
|-------------|-----------------------------------------------|---------------------|--------------------|
|             | A <sub>Weak</sub>                             | A <sub>Strong</sub> | A <sub>Total</sub> |
| H-ZSM-22(1) | 89.2                                          | 98.2                | 187.4              |
| H-ZSM-22(2) | 85.3                                          | 94.8                | 180.1              |
| H-ZSM-22(3) | 80.0                                          | 89.3                | 169.3              |
| H-ZSM-12(1) | 82.2                                          | 95.5                | 177.7              |
| H-ZSM-12(2) | 75.3                                          | 86.5                | 161.8              |
| H-ZSM-12(3) | 67.8                                          | 74.6                | 142.4              |
| H-MOR(1)    | 96.7                                          | 111.2               | 207.9              |
| H-MOR(2)    | 84.4                                          | 92.6                | 177.0              |
| H-MOR(3)    | 74.8                                          | 79.5                | 154.3              |

1 3.3. Metallic properties

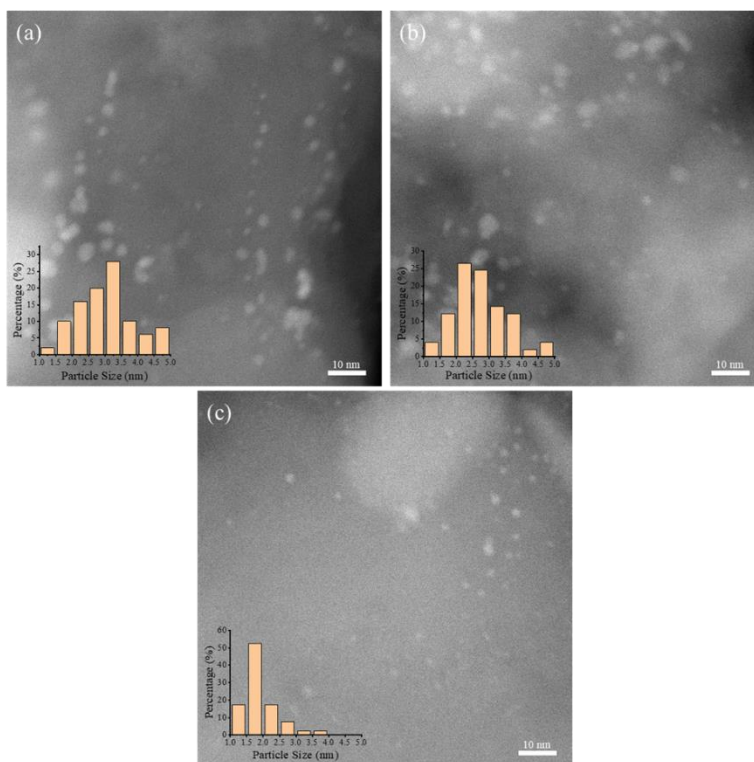

2

3 Fig. S3. TEM images of different samples (a) Pt/H-ZSM-22, (b) Pt/H-ZSM-12, (c) Pt/H-MOR.

4

1 **4. Catalytic performance**

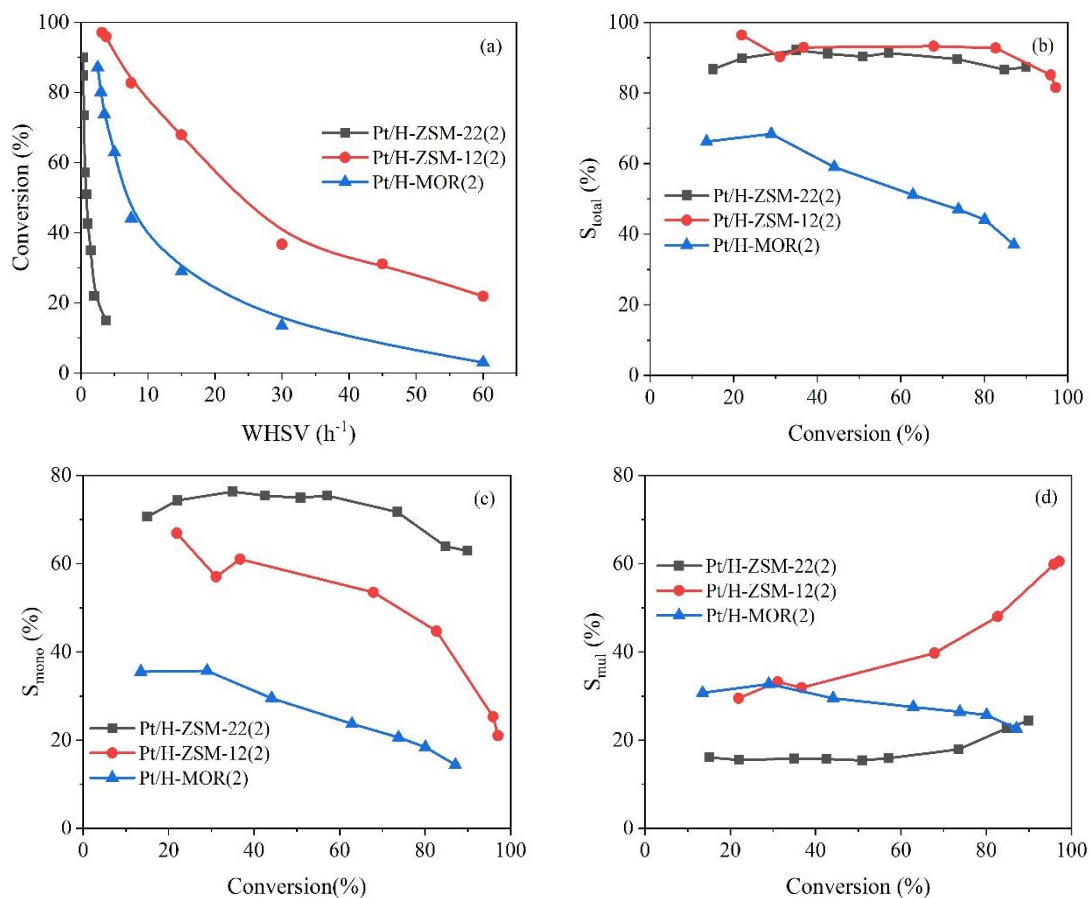

2 Fig. S4. The catalytic performance of Pt/H-ZSM-22(2), Pt/H-ZSM-12(2) and Pt/H-MOR(2) in n-  
3 dodecane hydroisomerization, (a) the conversion against the WHSV, (b) selectivity of total branched  
4 isomers versus conversion, (c) selectivity of mono-branched isomers versus conversion (d) selectivity of  
5 multi-branched isomers versus conversion. (Temperature = 280 °C,  $H_2/n-C_{12}$  (mole) = 6, total pressure  
6 of 2.0 MPa.)

7

1   **References**

- 2   1.     J. Yuan, Z. Liu, Y. Wu, J. Han, X. Tang, C. Li, W. Chen, X. Yi, J. Zhou, R. Krishna, G. Sastre  
3         and A. Zheng, *Proc Natl Acad Sci U S A*, 2021, **118**.  
4   2.     Baerlocher C and McCusker LB, Database of Zeolite Structures, [http://www.iza-  
6         structure.org/databases/](http://www.iza-<br/>5         structure.org/databases/)).  
7   3.     J. D. Gale and A. L. Rohl, *Mol. Simul.*, 2003, **29**, 291-341.  
8   4.     M. J. Sanders, M. Leslie and C. R. A. Catlow, *J. Chem. Soc., Chem. Commun.*, 1984, DOI:  
9         10.1039/c39840001271, 1271-1273.  
10  5.     H. Sun, *The Journal of Physical Chemistry B*, 1998, **102**, 7338-7364.  
11  6.     D. Frenkel, B. Smit and M. A. Ratner, *Phys. Today*, 1997, **50**, 66-66.
